# Supplementary material for: COVID-19 School Re-opening Plans: Rolling Back School Food Programming in Canada?
Source: Frontiers journal article supplement (doi:10.3389/fcomm.2022.767970), 2022-04-13
Supplement: Table_1.docx [file Table_1.docx]

# **Table 1. Primary Documents and Resources**

| **Province/Territory** | **Primary Documents/Resources** | **Publication and Revisions** |
| --- | --- | --- |
| Newfoundland and Labrador | Return to School Plan 2021. Together. Again. | September 2021 |
| A Safe Return to School - NFESD September Reopening Plan 2020-2021 | November 2, 2020 |
| September 3, 2020 |
| August 17, 2020 |
| July 6, 2020 |
| Newfoundland and Labrador K-12 Education Re-entry Plan | September 3, 2020 |
| August 14, 2020 |
| July 6, 2020 |
| Newfoundland and Labrador Public Health Guidance for K-12 Schools. | April 7, 2021 |
| September 3, 2020 |
| New Brunswick | Healthy and Safe School Guidelines | August 2021 |
| Return to School: Guide for Parents and the Public | August 13, 2020 |
| June 12, 2020 |
| Return to School: Direction for School Districts and School September 2020 | November 29, 2020 |
| October 15, 2020 |
| September 16, 2020 |
| Return to School September 2020 Executive Summary | September 2020 |
| Prince Edward Island | Prince Edward Island COVID-19 Back-to-School Public Health Guidance 2021 - 2022 | August 2021 |
| Public School Branch: Guidelines for Return to School September 2020 | September 28, 2020 |
| August 5, 2020 |
| Nova Scotia | Returning to Class for 2021-2022 | August 2021 |
| Nova Scotia’s Back to School Plan | December 18, 2020 |
| September 17, 2020 |
| August 14, 2020 |
| July 22, 2020 |
| Quebec | Orientation for Back-to-School 2021 | August 11, 2021 |
| COVID-19 – Plan de la rentrée scolaire/COVID-19 Back to School Plan | June 16, 2020 |
| Back to School 2020: Reopening of all schools in Quebec | August 10, 2020 |
| Ontario | Approach to Reopening Schools for the 2020-2021 School Year | June 19, 2020 |
| Guide to Reopening Ontario’s Schools | August 28, 2020 |
| August 24, 2020 |
| August 13, 2020 |
| July 30, 2020 |
| COVID-19: Health, Safety, and Operational Guidance for Schools (2021-2022) | August 13, 2021 |
| August 3, 2021 |
| Manitoba | Welcoming Our Students Back: Restoring Safe Schools – A Guide for Parents, Caregivers and Students: What to Expect When Welcomed Back to School | October 20, 2020 |
| September 2, 2020 |
| August 24, 2020 |
| August 13, 2020 |
| July 30, 2020 |
| Restoring Safe Schools—A Planning Guide for 2021-2022 School Year | August 24, 2021 |
| Restoring Safe Schools—A Guide for Parents, Caregivers and Students | August 24, 2021 |
| Saskatchewan | Safe Schools Plan 2021-22 | July 2021 |
| Primary and Secondary Educational Institution Guidelines | June 9, 2020 |
| Saskatchewan Safe Schools Plan | August 27, 2020 |
| July 8, 2021 |
| Alberta | 2021-2022 School Year Plan | August 2021 |
| June 2021 |
| COVID-19 Information: Guidance for School Re-Entry - Scenario 1 | November, 2020 |
| October 8, 2020 |
| August 27, 2020 |
| August 20, 2020 |
| July 21, 2020 |
| June 10, 2020 |
| COVID-19 Information: Guidance for School Re-Entry - Scenario 2 | November, 2020 |
| October 8, 2020 |
| August 27, 2020 |
| August 20, 2020 |
| July 21, 2020 |
| British Columbia | COVID-19 Public Health Guidance for K-12 School Settings | August 24, 2021 |
| June 17, 2021 |
| September 24, 2020 |
| September 11, 2020 |
| September 3, 2020 |
| August 26, 2020 |
| Yukon | K-12 School Guidelines for 2021-22: COVID-19 | August 19, 2021 |
| School During COVID-19: Guidelines for the 2021-22 School Year | August 19, 2021 |
| School During COVID-19 | September 24, 2020 |
| August 12, 2020 |
| July 9, 2020 |
| Guidelines for K-12 School Settings | July 23, 2020 |
| June 4, 2020 |
| Northwest Territories | Back to School 2021-22 Guidelines | August 11, 2021 |
| Reopening Schools Safely: Planning for the 2020-2021 School Year | July 3, 2020 |
| Nunavut | 2021-22 Health and Safety Guidelines for Nunavut Schools | July 28, 2021 |
| 2020-2021 Opening Plan for Nunavut Schools: Health and Safety | December 16, 2020 |
| July 24, 2020 |
| Health and Safety Guidelines for Nunavut Schools | August 2020 |

# **Reference List**

## NFL

Department of Education, Newfoundland and Labrador. (2020). A Safe Return to School -- NFESD September Reopening Plan 2020-2021. <https://www.gov.nl.ca/education/files/Safe-Return-to-School-Reopening-Plan.pdf>

Department of Education, Newfoundland and Labrador. (2020). Newfoundland and Labrador K-12 Education Re-Entry Plan. <https://www.gov.nl.ca/education/files/education-re-entry-document.pdf>

Department of Education, Newfoundland and Labrador. (2021). Return to School Plan. Together. Again. <https://www.gov.nl.ca/education/files/K-12-School-Plans-September-2021.pdf>

Government of Newfoundland and Labrador. (2020; 2021). Newfoundland and Labrador Public Health Guidance for K-12 Schools. <https://www.gov.nl.ca/education/files/Public-Health-Guidance-for-K-12-Schools.pdf>

## NB

Department of Education and Early Childhood Development, New Brunswick. (2020). Return to School: Direction for School Districts and Schools September 2020. [Version last Updated November 29, 2020]. <https://www2.gnb.ca/content/dam/gnb/Departments/ed/pdf/ReturnSchool_Districts.pdf>

Department of Education and Early Childhood Development, New Brunswick. (2020). Return to School: Guide for Parents and the Public September 2020. ISBN 978-1-4605-2605-7 (PDF version). <https://www2.gnb.ca/content/dam/gnb/Departments/ed/pdf/return-to-school-guide.pdf>

Department of Education and Early Childhood Development, New Brunswick. (2020). Return to School September 2020 Executive Summary. <https://www2.gnb.ca/content/dam/gnb/Departments/ed/pdf/ReturnSchoolExecutiveSummary.pdf>

Department of Education and Early Childhood Development, New Brunswick. (2021). Healthy and Safe Schools: 2021-22 Guidance for COVID-19 and Other Infectious Diseases. <https://www2.gnb.ca/content/dam/gnb/Departments/ed/pdf/2021-22-guidelines.pdf>

## PEI

Department of Education and Lifelong Learning, Prince Edward Island. (2020). Public Schools Branch: Guidelines for Return to School September 2020. <https://www.princeedwardisland.ca/sites/default/files/publications/psb_september_2020_guidelines.pdf>

Department of Health and Wellness, Prince Edward Island. (2021). Prince Edward Island COVID-19 Back to School Public Health Guidance 2021-22. <https://www.princeedwardisland.ca/sites/default/files/publications/cphobacktoschool2021-2022.pdf>

## NS

Department of Education and Early Childhood Development, Nova Scotia. (2020). Nova Scotia's Back to School Plan. ISBN: 978-1-77448-053-3. <https://esd.hrce.ca/sites/default/files/websites/esd.hrce.ca/our-school-file/2021/02/back-to-school-plan.pdf>

Government of Nova Scotia. (2021). Returning to Class for 2021-22. <https://backtoschool.ednet.ns.ca/returning-to-class>

## QB

Ministère de l’Éducation. Québec. (2020). *COVID-19 – Plan de la rentrée scolaire/COVID-19 Back to School Plan. Government of Quebec.* ISBN 978-2-550-87328-0 (PDF). <https://cdn-contenu.quebec.ca/cdn-contenu/adm/min/education/publications-adm/covid-19/plan-rentree-2020-en.pdf?1598463227>

Ministère de l'Éducation, Quebec. (2021). Orientations for Back-to-School 2021. <https://cdn-contenu.quebec.ca/cdn-contenu/adm/min/education/publications-adm/covid-19/Feuillet_rentree2021_AN.pdf?1628706740>

## ON

Department of Education and Training, Ontario. (2020). Approach to Reopening Schools for the 2020-2021 School Year*.* <https://www.ontario.ca/page/approach-reopening-schools-2020-2021-school-year>

Department of Education and Training, Ontario. (2020). Archived--Guide to Reopening Ontario's Schools. <https://www.ontario.ca/page/guide-reopening-ontarios-schools>

Department of Education and Training, Ontario. (2021). COVID-19: Health, Safety and Operational Guidance for Schools (2021-22). <https://www.ontario.ca/document/covid-19-health-safety-and-operational-guidance-schools-2021-2022>

## MB

Government of Manitoba. (2020). Welcoming Our Students Back: Restoring Safe Schools – A Guide for Parents, Caregivers and Students: What to expect when welcomed back to school. <https://www.gov.mb.ca/asset_library/en/covid/k-12-reopeningplan-guideforparents.pdf>

Government of Manitoba. (2021). Restoring Safe Schools—A Guide for Parents, Caregivers and Students. <https://manitoba.ca/asset_library/en/covid/k12_guideforparents.pdf>

Government of Manitoba. (2021). Restoring Safe Schools—A Planning Guide for 2021-2022 School Year. <https://manitoba.ca/asset_library/en/covid/k12-guidelines-aug2021.pdf>

## SK

Government of Saskatchewan. (2020). Primary and Secondary Educational Institution Guidelines. <https://www.saskatchewan.ca/government/health-care-administration-and-provider-resources/treatment-procedures-and-guidelines/emerging-public-health-issues/2019-novel-coronavirus/re-open-saskatchewan-plan/guidelines/primary-and-secondary-educational-institution-guidelines>

Government of Saskatchewan. (2021). Safe Schools Plan 2021-22. <https://www.rcsd.ca/Documents/SK%20Safe%20Schools%20Plan%202021-2022.pdf>

Government of Saskatchewan. (2020). Saskatchewan Safe Schools Plan. <https://www.saskatchewan.ca/-/media/news-release-backgrounders/2020/aug/return-to-school-info-pamphlet.pdf>

## AB

Government of Alberta. (2020). COVID-19 Information: Guidance for School Re-Entry -- Scenario 1. <https://open.alberta.ca/dataset/3bc9f561-36aa-4ac8-8e73-afce55227c05/resource/1b341a44-1906-4c62-8acf-6f0500cc0102/download/edc-covid-guidance-school-re-entry-scenario-1-update-2020-07-21.pdf>

Government of Alberta. (2020). COVID-19 Information: Guidance for School Re-Entry -- Scenario 2. <https://open.alberta.ca/dataset/85be3335-611d-42a3-a607-4f2bd14e7ea8/resource/6aa359fc-5bed-4c2c-ad50-28adc4ce2369/download/edc-covid-guidance-school-re-entry-scenario-2.pdf>

Ministry of Education, Alberta. (2021). 2021-2022 School Year Plan. <https://open.alberta.ca/dataset/13d2242a-d310-419e-960c-6fe273d0f7b3/resource/ddac0c8a-a68d-46e1-9d76-2a4d34385273/download/edc-school-year-plan-2021-2022.pdf>

## BC

Ministry of Advanced Education and Skills Training, British Columbia. (2020; 2021). COVID-19 Public Health Guidance for K-12 School Settings. <https://www2.gov.bc.ca/gov/content/education-training/k-12/covid-19-safe-schools>

## YK

Government of Yukon. (2020). Guidelines for K-12 School Settings. <http://sec.yukonschools.ca/uploads/4/8/3/3/48336245/edu-guidance_for_k-12_school_settings.pdf>

Government of Yukon. (2020). School During COVID-19. <https://yukon.ca/sites/yukon.ca/files/edu/edu-school-during-covid-19_final.pdf>

Government of Yukon. (2021). K-12 School Guidelines for 2021-22: COVID-19. <https://yukon.ca/en/health-and-wellness/covid-19-information/education-and-school-supports-covid-19/k-12-school>

Government of Yukon. (2021). [School During COVID-19: Guidelines for the 2021-22 School Year](https://yukon.ca/sites/yukon.ca/files/edu/edu-school-during-covid-19.pdf). <https://yukon.ca/sites/yukon.ca/files/edu/edu-school-during-covid-19.pdf>

## NTW

Government of Northwest Territories. (2020). Reopening Schools Safely: Planning for the 2020-2021 School Year. <https://www.gov.nt.ca/covid-19/sites/covid/files/resources/reopening_nwt_schools_safely_plan_for_2020-21_eng.pdf>

Government of Northwest Territories. (2021). Back to School 2021-22 Guidelines. <https://www.gov.nt.ca/covid-19/en/backtoschool>

## NV

Government of Nunavut. (2020). 2020-2021 Opening Plan for Nunavut School: Health & Safety. <https://gov.nu.ca/sites/default/files/files/2020-21_opening_plan_for_nunavut_schools_-_eng.pdf>

Department of Education, Nunavut. (2020). Health and Safety Guidelines for Nunavut Schools. <https://gov.nu.ca/sites/default/files/health_and_safety_guidelines_en.pdf>

Department of Education, Nunavut. (2021). 2021-22 Health and Safety Guidelines for Nunavut Schools. <https://gov.nu.ca/sites/default/files/2021-22_health_and_safety_guidelines_eng_with_table_of_contents.pdf>
